# Supplementary material for: Boosting robot-assisted rehabilitation of stroke hemiparesis by individualized selection of upper limb movements – a pilot study
Source: Springer Nature journal article supplement (doi:10.1186/s12984-019-0513-0), 2019-03-20
Supplement: MOESM1 [file 16563656]

**SUPPLEMENTARY TABLE S1:**

**Secondary clinical outcome measures – baseline values<sup>a</sup>**

| Group                        | MRC-MPS           | MAS<br>(elbow flexors) | nMAS - UE         | BI                |
|------------------------------|-------------------|------------------------|-------------------|-------------------|
| Control                      | 49.7 (5.8)        | 1.22 (0.62)            | 2.67 (4.02)       | 18.2 (1.8)        |
| Test                         | 39.9 (14.9)       | 1.28 (0.49)            | 1.93 (2.96)       | 16.8 (3.2)        |
| <b>p</b><br>(between groups) | 0.14 <sup>b</sup> | 0.91 <sup>c</sup>      | 0.62 <sup>c</sup> | 0.30 <sup>b</sup> |

<sup>a</sup>Group means (and standard deviations)

MRC-MPS: MRC Muscle Power scale (score range: 0-70); MAS: Modified Ashworth Scale (0-4); nMAS-UE: Upper extremity part of new Motor Assessment Scale (0-18), BI: Barthel index (0-20). For all scales—except MAS – higher score indicates lower severity.

<sup>b</sup>Independent samples T-test 2-tailed (Test group: df=6; control group: df= 8)

<sup>c</sup>Mann-Whitney U Test, 2-tailed, exact

**SUPPLEMENTARY TABLE S2:**

**Secondary task-related outcome measures – baseline values<sup>a</sup>**

| Group                                    | Mean <sup>b</sup> |             |                   | Variation <sup>c</sup> |             |                   |
|------------------------------------------|-------------------|-------------|-------------------|------------------------|-------------|-------------------|
|                                          | Assist(N)         | Guide(N)    | end error<br>(cm) | Assist(N)              | Guide(N)    | end error<br>(cm) |
| Control                                  | 2.02 (1.21)       | 1.81 (1.14) | 0.82 (0.28)       | 1.71 (1.17)            | 1.23 (0.89) | 0.43 (0.20)       |
| Test                                     | 2.18 (1.65)       | 2.02 (1.64) | 0.89 (0.39)       | 1.49 (1.12)            | 1.29 (1.09) | 0.44 (0.25)       |
| <b>p<sup>d</sup></b><br>(between groups) | 0.82              | 0.77        | 0.72              | 0.69                   | 0.90        | 0.93              |

<sup>a</sup>Group means (and standard deviations)

<sup>b</sup>Mean performance across the 8x8 movement testing conditions

<sup>c</sup>The standard deviation of performance computed across the 8x8 movement conditions.

<sup>d</sup>Independent samples T-test 2-tailed (Test group: df=6; control group: df= 8)

**SUPPLEMENTARY TABLE S3:**

**Secondary clinical outcome measures: post-training change from baseline<sup>a</sup>**

| Group   | MRC-MPS                           | MAS<br>(elbow flexors)             | UL nMAS                          | BI                                             |
|---------|-----------------------------------|------------------------------------|----------------------------------|------------------------------------------------|
| Control | -0.4 (6.7)<br>p=0.71 <sup>b</sup> | -0.1 (0.5)<br>p=0.56 <sup>c</sup>  | 1.9 (3.8)<br>p=0.41 <sup>b</sup> | 0.19 (0.5) <sup>d</sup><br>p=0.50 <sup>b</sup> |
| Test    | 2.6 (4.3)<br>p=0.17 <sup>c</sup>  | 0.07 (0.19)<br>p=0.25 <sup>b</sup> | 1.8 (2.7)<br>p=1.0 <sup>c</sup>  | -0.5 (1.1)<br>p=0.28 <sup>c</sup>              |

<sup>a</sup> Group means (and standard deviations)

<sup>b</sup> Related-samples Wilcoxon Signed Rank Test (exact sig., 2-tailed)

<sup>c</sup> Paired T-test (Test group: df=6; control group: df= 8 --except for BI where df=7)

<sup>d</sup> Missing data from one aphasic participant (due to unavailability of interpreter for his speech)

**SUPPLEMENTARY TABLE S4**

Task-related training effects on post-training mean performance<sup>a</sup>: 2x2 repeated measure ANOVA<sup>b</sup>

|                                                  | <i>Guide</i>                                   | <i>Assist</i>                                   | <b>End-error</b>                                         |
|--------------------------------------------------|------------------------------------------------|-------------------------------------------------|----------------------------------------------------------|
| <b><u>Session effect</u></b><br>(within subject) | F(1,14)=3.89, p=0.069<br>partial $\eta^2=0.22$ | F(1,14)=0.67, p=0.43,<br>partial $\eta^2=0.05$  | F(1,14)=15.4, p= <b>0.002</b> ,<br>partial $\eta^2=0.52$ |
| <b><u>Group effect</u></b>                       | F(1,14)=0.22, p=0.65,<br>partial $\eta^2=0.02$ | F(1,14)=0.27, p=0.63,<br>partial $\eta^2=0.02$  | F(1,14)=0.08, p=0.78,<br>partial $\eta^2=0.01$           |
| <b><u>Session x group interaction</u></b>        | F(1,14)=0.76, p=0.40,<br>partial $\eta^2=0.05$ | F(1,14)=1.37, p=0.26,<br>partial $\eta^2=0.089$ | F(1,14)=0.16, p=0.70,<br>partial $\eta^2=0.01$           |

<sup>a</sup>Mean performance across the 8x8 movement testing conditions

<sup>b</sup>Repeated measures ANOVA with session (baseline, post-training) as a within-subject factor and group (control, test) as a between-subject factor

**SUPPLEMENTARY TABLE S5**

Task-related training effects on post-training performance variation<sup>a</sup>: 2x2 repeated measure ANOVAs<sup>b</sup>

|                                                  | <i>Guide</i>                                   | <i>Assist</i>                                   | <b>End-error</b>                                |
|--------------------------------------------------|------------------------------------------------|-------------------------------------------------|-------------------------------------------------|
| <b><u>Session effect</u></b><br>(within subject) | F(1,14)=0.39, p=0.54,<br>partial $\eta^2=0.02$ | F(1,14)=0.41, p=0.53,<br>partial $\eta^2=0.03$  | F(1,14)=4.66, p=0.049,<br>partial $\eta^2=0.25$ |
| <b><u>Group effect</u></b>                       | F(1,14)=0.25, p=0.62,<br>partial $\eta^2=0.02$ | F(1,14)=0.02, p=0.89,<br>partial $\eta^2=0.001$ | F(1,14)=0.051, p=0.83,<br>partial $\eta^2=0.01$ |
| <b><u>Session x group interaction</u></b>        | F(1,14)=1.37, p=0.26,<br>partial $\eta^2=0.09$ | F(1,14)=4.01, p=0.065,<br>partial $\eta^2=0.22$ | F(1,14)=0.16, p=0.70,<br>partial $\eta^2=0.004$ |

<sup>a</sup>The standard deviation of performance computed across the 8x8 movement conditions.

<sup>b</sup>Repeated measures ANOVAs conducted for each measure with session (baseline, post-training) as a within-subject factor and group (control, test) as a between-subject factor

**SUPPLEMENTARY TABLE S6**

**Task-related training effects in the follow-up session: 2x2 repeated measure ANOVAs<sup>a</sup>**

| Measure type                 |                                           | <i>Guide</i>                                         | <i>Assist</i>                                       | End-error                                                  |
|------------------------------|-------------------------------------------|------------------------------------------------------|-----------------------------------------------------|------------------------------------------------------------|
| <b>Mean<sup>b</sup></b>      | <b>Session effect</b><br>(within subject) | F(1,14)=1.49 , p=0.24 ,<br>partial $\eta^2$ =0.096   | F(1,14)=0.038 , p=0.85 ,<br>partial $\eta^2$ =0.003 | F(1,14)=7.78 , p= <b>0.014</b> ,<br>partial $\eta^2$ =0.36 |
|                              | <b>Group effect</b>                       | F(1,14)=0.007 , p=0.97 ,<br>partial $\eta^2$ <0.001  | F(1,14)=0.003 , p=0.96 ,<br>partial $\eta^2$ <0.001 | F(1,14)=0.004 , p=0.95 ,<br>partial $\eta^2$ <0.001        |
|                              | <b>Session x group interaction</b>        | F(1,14)=2.51 , p=0.36 ,<br>partial $\eta^2$ =0.152   | F(1,14)=0.93 , p=0.35 ,<br>partial $\eta^2$ =0.063  | F(1,14)=3.78 , p=0.072 ,<br>partial $\eta^2$ =0.21         |
| <b>Variation<sup>c</sup></b> | <b>Session effect</b><br>(within subject) | F(1,14)= 0.011 , p=0.92 ,<br>partial $\eta^2$ =0.001 | F(1,14)=0.016 , p=0.90 ,<br>partial $\eta^2$ =0.001 | F(1,14)=1.75 , p=0.208 ,<br>partial $\eta^2$ =0.11         |
|                              | <b>Group effect</b>                       | F(1,14)=0.003 , p=0.96 ,<br>partial $\eta^2$ <0.001  | F(1,14)=0.096 , p=0.76 ,<br>partial $\eta^2$ =0.007 | F(1,14)=0.02 , p=0.91 ,<br>partial $\eta^2$ =0.01          |
|                              | <b>Session x group interaction</b>        | F(1,14)=0.99 , p=0.34 ,<br>partial $\eta^2$ =0.066   | F(1,14)=0.29 , p=0.60 ,<br>partial $\eta^2$ =0.02   | F(1,14)=0.96 , p=0.344 ,<br>partial $\eta^2$ =0.06         |

<sup>a</sup> Repeated measures ANOVAs conducted for each performance measure with session (baseline, follow-up) as a within-subject factor and group (control, test) as a between-subject factor.

<sup>b</sup> Mean performance across the 8x8 movement testing conditions

<sup>c</sup> The standard deviation of performance computed across the 8x8 movement conditions.
