# Supplementary material for: Boosting robot-assisted rehabilitation of stroke hemiparesis by individualized selection of upper limb movements – a pilot study
Source: Springer Nature journal article supplement (doi:10.1186/s12984-019-0513-0), 2019-03-20
Supplement: MOESM2 [file 16563656]

**SUPPLEMENTARY FIGURE S1:**

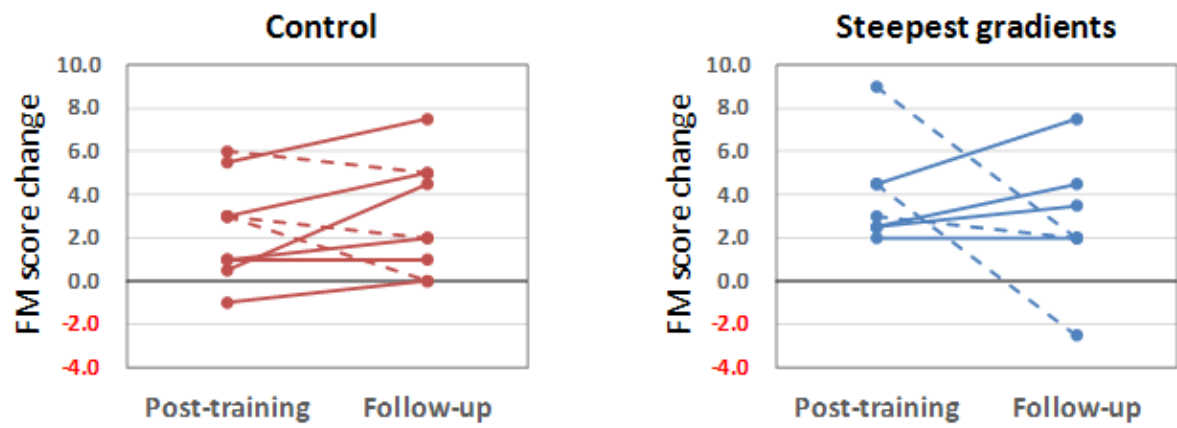

**Figure S1.** Individual change in FMA-EU scores (from baseline) few days post training and 4 weeks later (follow-up) in the two groups. Dashed lines indicate score decreases in follow-up session compared to post-training.
